# Supplementary material for: Lumino-magnetic YAG:Ce nanophosphors: novel synthesis routes for efficient luminescence and magnetic properties
Source: Royal Society of Chemistry journal article supplement (doi:10.1039/c4tc01960a), 2014-01-01
Supplement: c4tc01960a1.pdf [file c4tc01960a1.pdf]

# *Lumino-Magnetic YAG:Ce Nanophosphors: A Novel Synthesis routes for efficient luminescence and magnetic properties*

**K.Jayanthi and Sunkara V Manorama**

Nanomaterials Laboratory, Inorganic and Physical Chemistry Division, CSIR-Indian Institute of  
Chemical Technology, Hyderabad -500007, India.

## ■ SUPPLEMENTARY INFORMATION

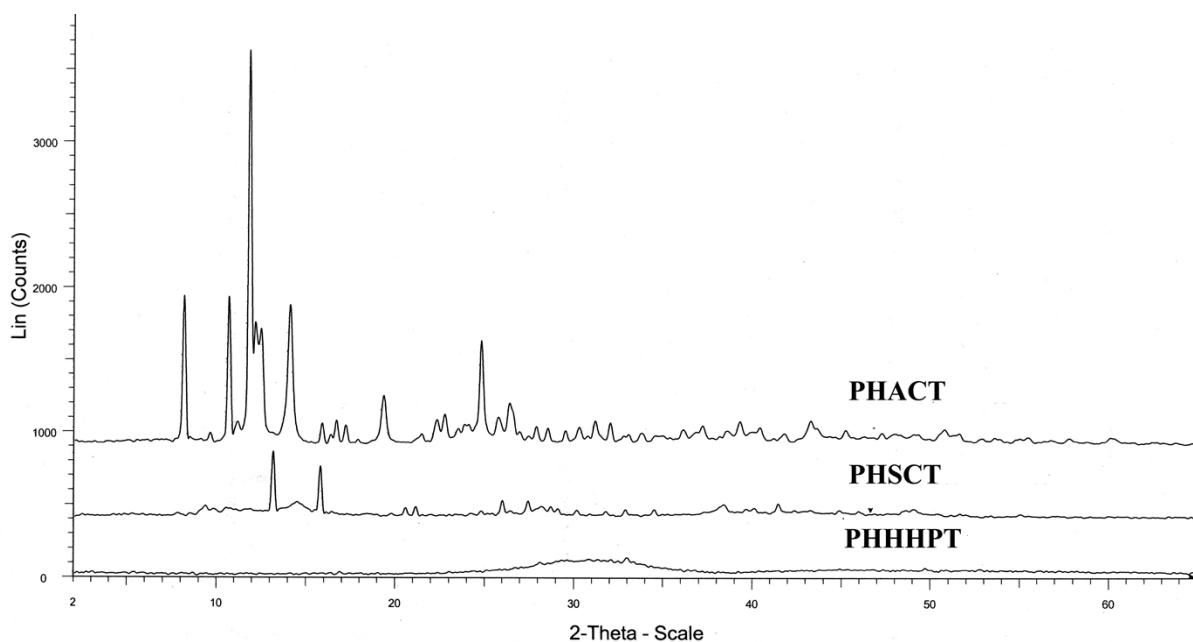

**Figure 1. Structural properties of YAG:Ce NPs.** An XRD pattern of the Ce doped YAG (0.1M) prepared under various synthesis methods without annealing.

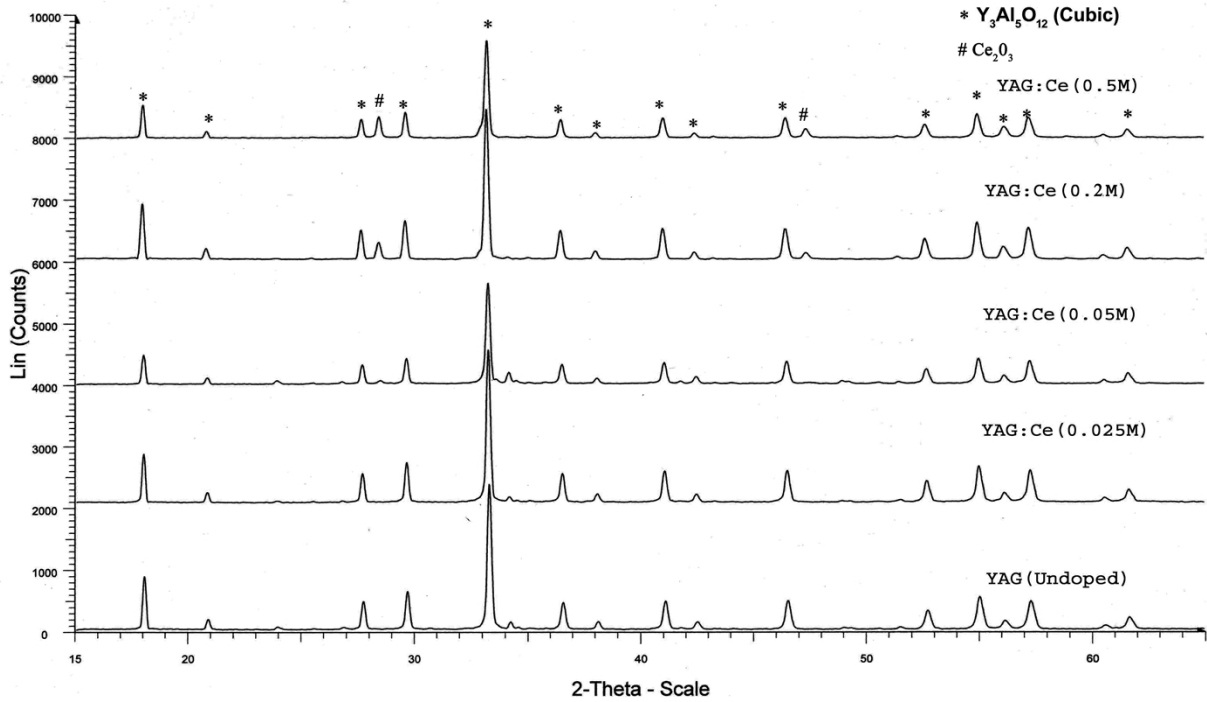

**Figure 2. Structural properties of undoped and Ce doped YAG NPs.** An XRD pattern of the undoped and Ce doped YAG NPs shows purity and crystalline nature of the samples. Observed changes in lattice parameters and  $(2\theta)$  angle peak shift and precipitated secondary phase of Ce at high Ce concentration confirmed the presence of dopant.

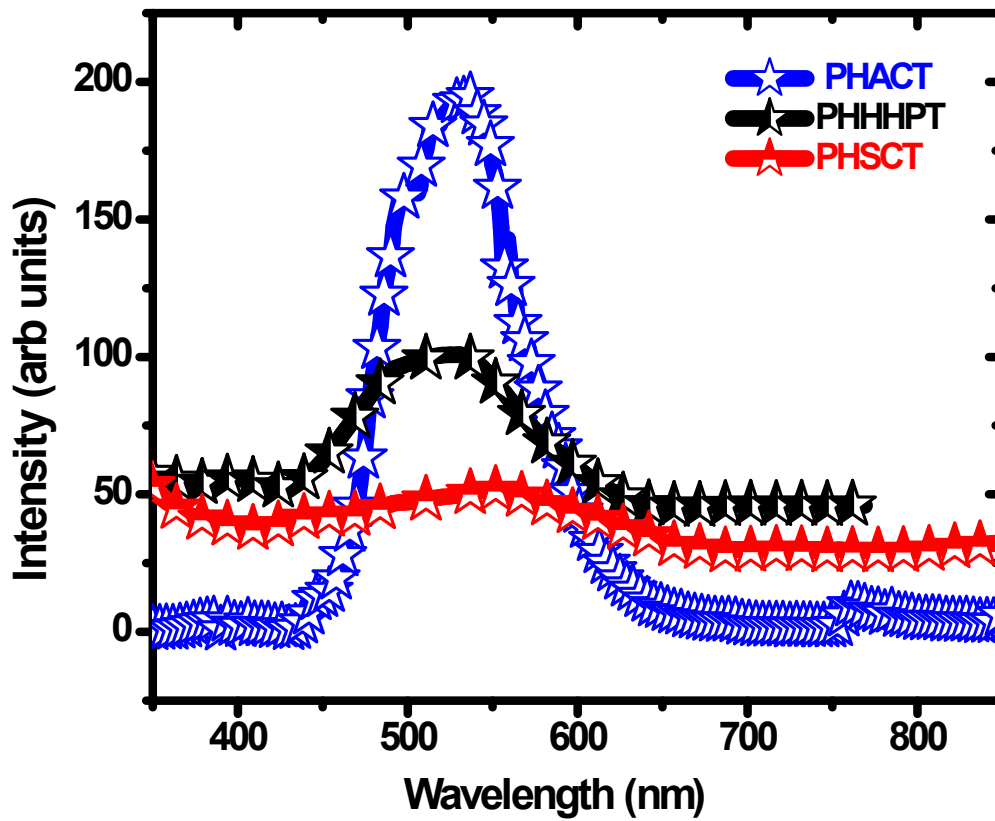

Fig 3. (Colour online) Spectroscopic investigation of the YAG:Ce NPs. PL studies of the undoped YAG NPs prepared by various synthesis techniques.
